# Supplementary material
Source: PubMed Central journal article supplement (PMC4055026)
Supplement: NIHMS443847-supplement-1.pdf [file NIHMS443847-supplement-1.pdf]

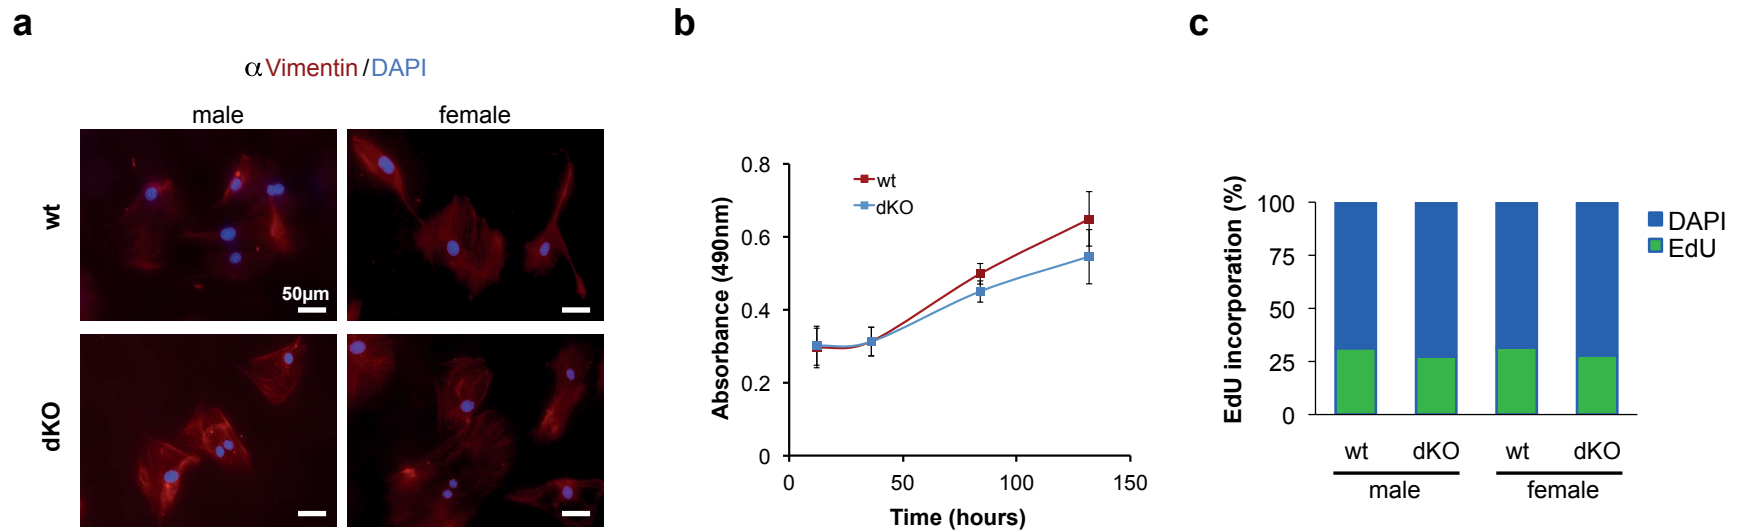

**Supplementary Figure S1. Characterization of dermal fibroblasts isolated from wild type and macroH2A double knockout (*macroH2A1*  $-/-$ ; *macroH2A2*  $-/-$ ) mice.** (a) Immunofluorescence (IF) of Vimentin in both wt and dKO DFs. DAPI used to stain DNA; Scale bar, 50 $\mu$ m (b) MTS assay of wt and dKO DF showing proliferation using four time points (12, 36, 84 and 132 hours); mean  $\pm$  s.d. (n=6), unpaired Student's test (two tailed)  $p = 0.24$ ; male and female results combined. (c) EdU incorporation in wt and dKO DFs; EdU positive nuclei shown as percentage of the total DAPI-stained nuclei, mean (n=4).

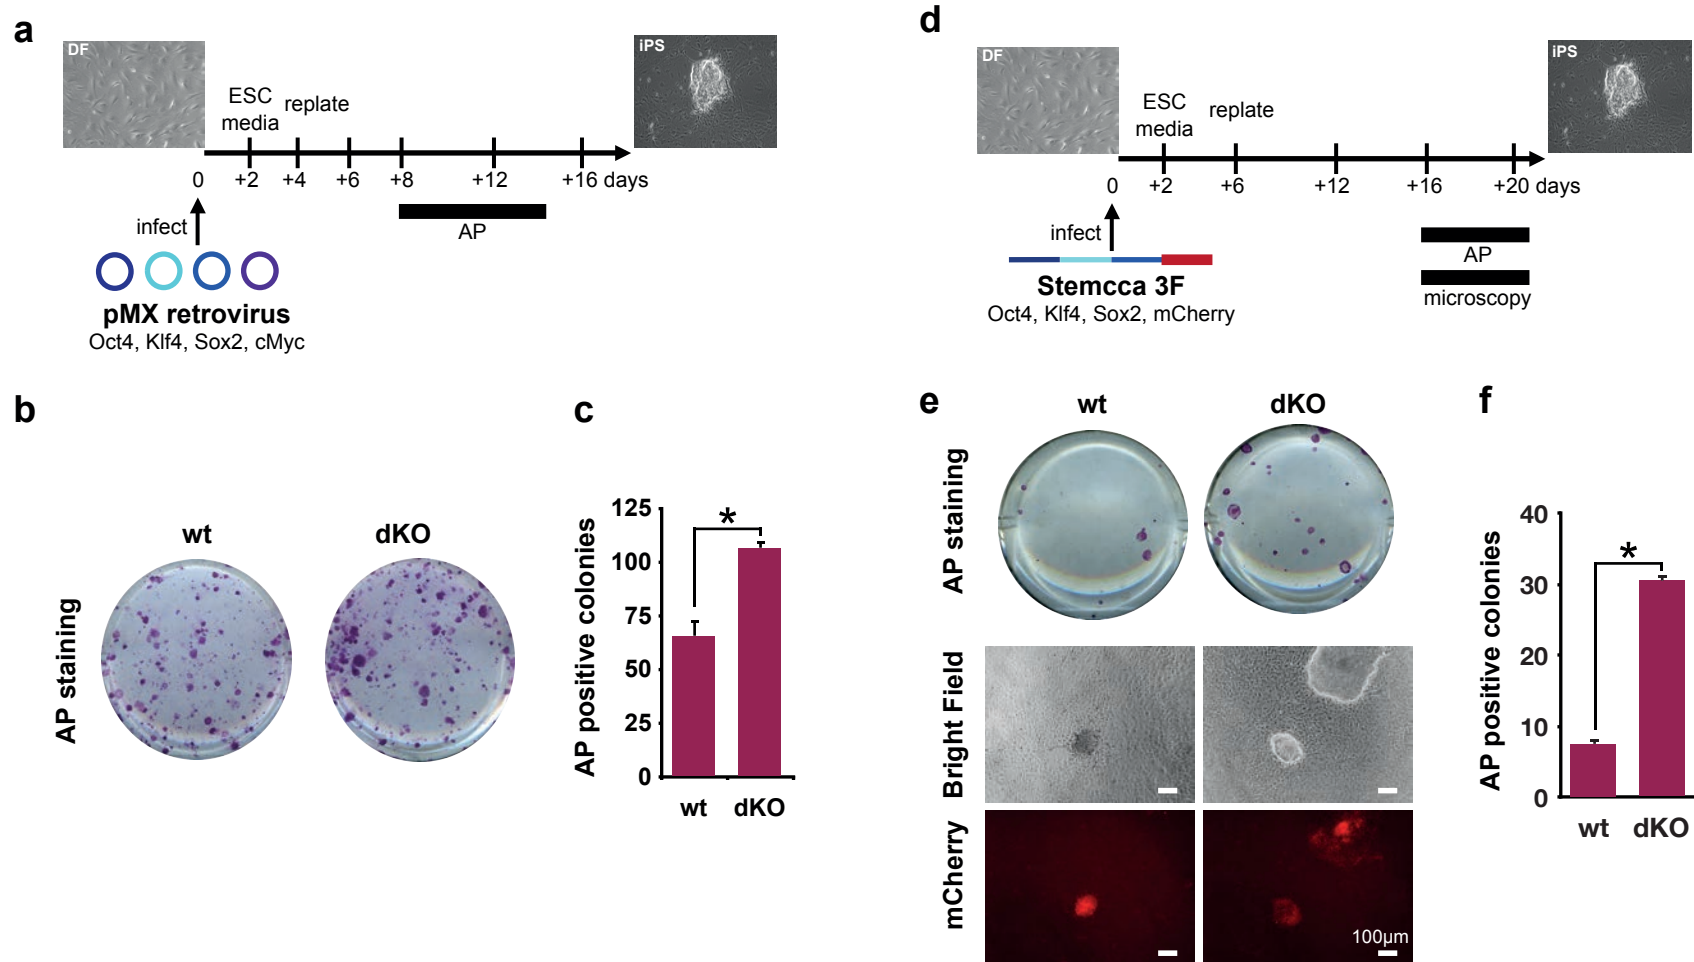

**Supplementary Figure S2. macroH2A deficiency improves iPS reprogramming efficiency using different iPS methodologies.** (a) Experimental scheme of iPS reprogramming of DF using four individual pMX retroviral vectors encoding OSKM. (b) Representative wells of AP positive iPS colonies, indicating increased reprogramming efficiency in dKO DFs 14 days post-infection. (c) Number of AP positive colonies at day 14 post-infection; mean  $\pm$  s.d. (n=3); unpaired Student's test (two tailed)  $p=0.02$  (asterisk). (d) Experimental scheme of iPS reprogramming of DF using a polycistronic lentiviral vector (Stemcca) encoding three factors (3F) and a reporter gene (mCherry). (e) Representative wells of AP positive iPS colonies, indicating increased reprogramming efficiency in dKO DFs 20 days post-infection, bright field and mCherry images of iPS colonies; Scale bar, 100µm. (f) Number of AP positive colonies at day 20 post-infection; mean  $\pm$  s.d. (n=3); unpaired Student's test (two tailed)  $p=0.0001$  (asterisk).

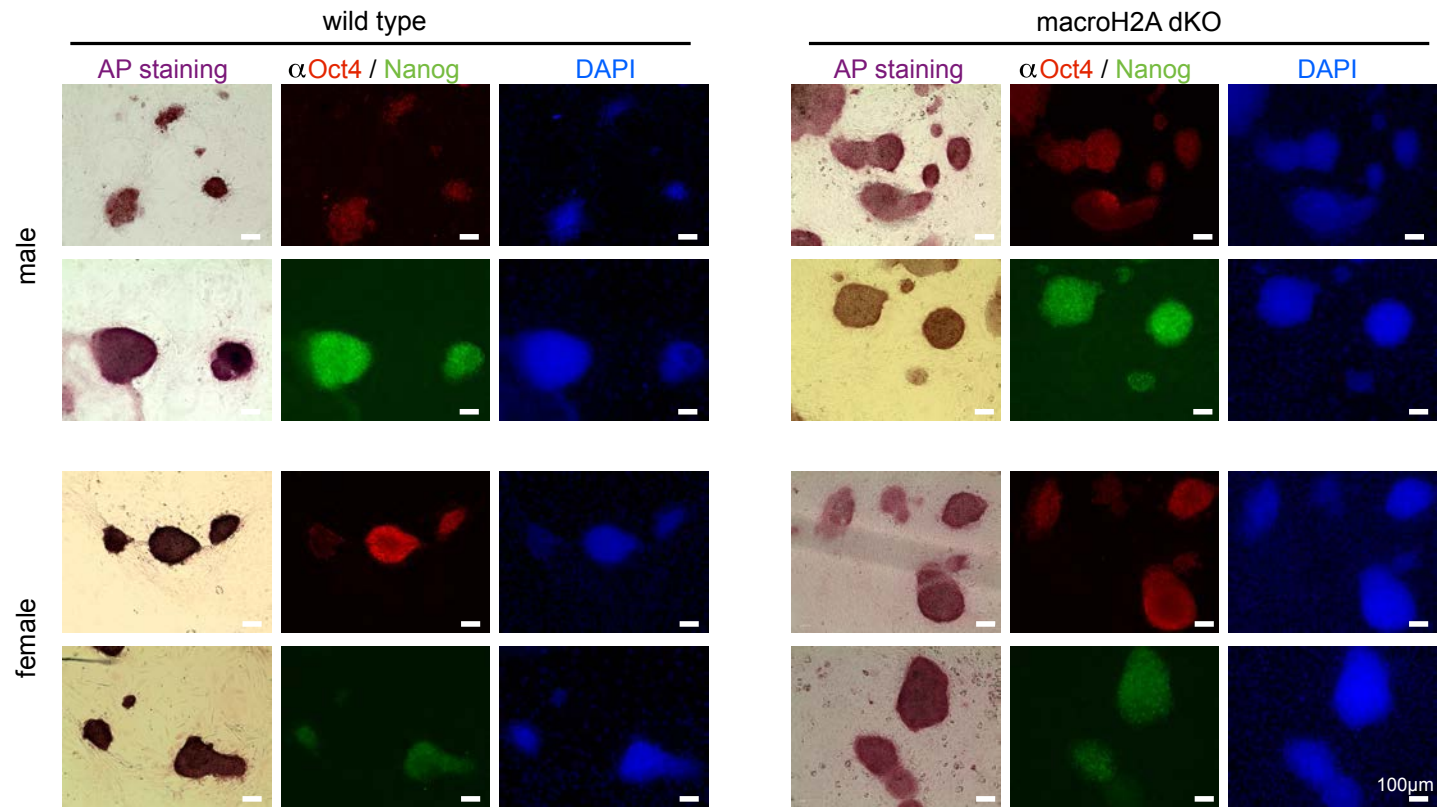

**Supplementary Figure S3. Characterization of macroH2A wild type and dKO iPS colonies.** IF of AP positive iPS colonies from both wt and dKO, male and female DFs, expressing Oct4 and endogenous Nanog, at 14 days post-infection. DAPI used to stain DNA; Scale bar, 100µm.

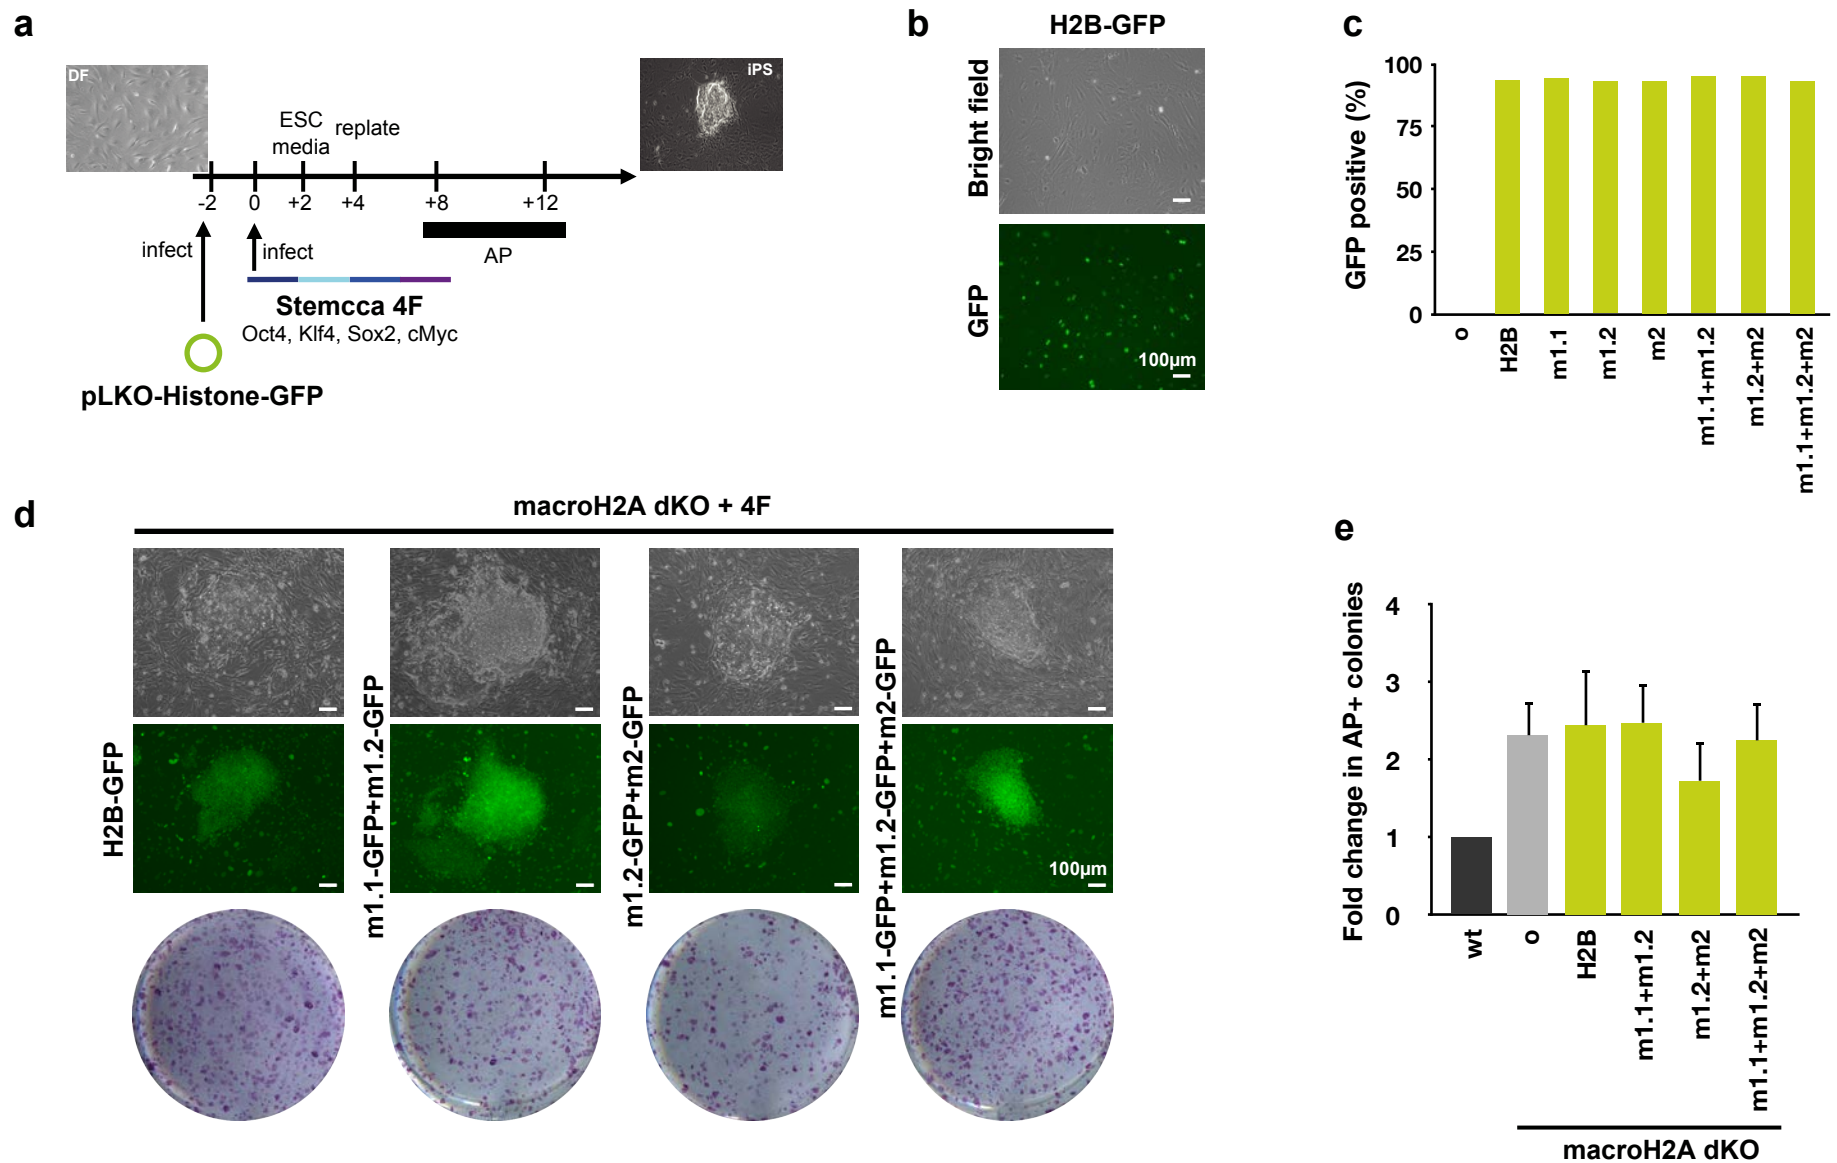

**Supplementary Figure S 4. Expression of multiple macroH2A isoforms simultaneously during reprogramming .** (a) Experimental scheme of iPS reprogramming from DFs using pLKO-based lentiviral vector for over-expression of macroH2A isoforms, and a polycistronic lentiviral vector (Stemcca) encoding four factors (4F). (b) Bright field and GFP image of infected DFs; Scale bar, 100µm. (c) Percentage of cells infected with GFP-tagged histones, as analyzed by FACS. (d) Representative wells of AP positive iPS colonies at 12 days post-infection, bright field and GFP image of single colonies shown; Scale bar, 100µm. (e) Quantitation of fold-change in AP positive colonies over wt; [o] represents uninfected; mean  $\pm$  s.d. (n=3).

**a**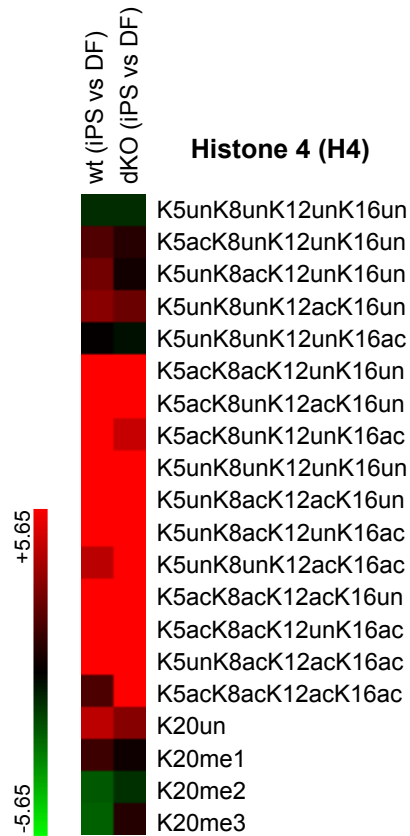**b**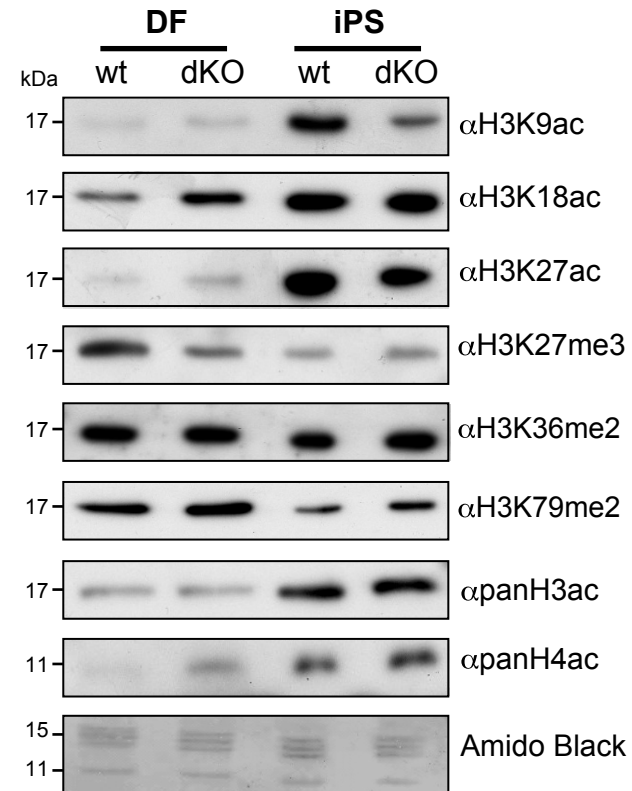

**Supplementary Figure S5. qMS heatmap of Histone 4 (H4) PTMs and validation of Histone PTM changes by immunoblot.** (a) qMS heatmap of H4 PTMs comparing iPS cells with DFs, in wt and macroH2A dKO cells. Note increased levels of acetylation in both wt and dKO cells after reprogramming. (b) Chromatin extracts from wt and macroH2A dKO DFs and iPS cells probed for Histone PTMs; Amido Black of core histones used for loading.

**a**

|                               | Input     | mH2A1     |          | mH2A2     |          | H3K27me3 |          | H3K27ac  |  |
|-------------------------------|-----------|-----------|----------|-----------|----------|----------|----------|----------|--|
|                               |           | WT        | DKO      | WT        | WT       | DKO      | WT       | DKO      |  |
| Raw reads                     | 134989009 | 136521456 | 52818348 | 80960398  | 71365535 | 56322898 | 39631148 | 58286340 |  |
| Bowtie alignments (wiggle)    | 84038942  | 76593240  | 22298153 | 62803448  | 51817491 | 42454756 | 29580671 | 43093454 |  |
| Alignments analyzed (MACS)    | 72501485  | 47995347  | 11390081 | 46205381  | 44238865 | 36191678 | 26549590 | 36908463 |  |
| Total Peak count (MACS)       | -         | 156296    | 90656    | 165617    | 132437   | 110575   | 67873    | 65882    |  |
| Total peak length (bp) (MACS) | -         | 65385906  | 30293877 | 112170432 | 85980203 | 63377672 | 79925863 | 74414216 |  |
| Total domains (Sicer)         | -         | 32339     | -        | 55751     | 31517    | -        | -        | -        |  |

**c**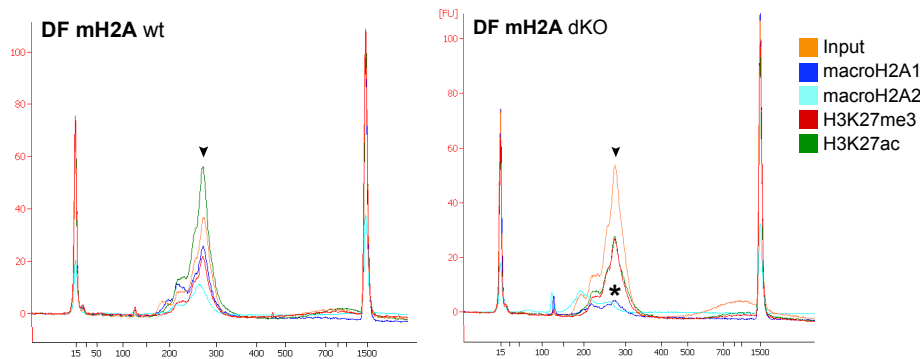**b**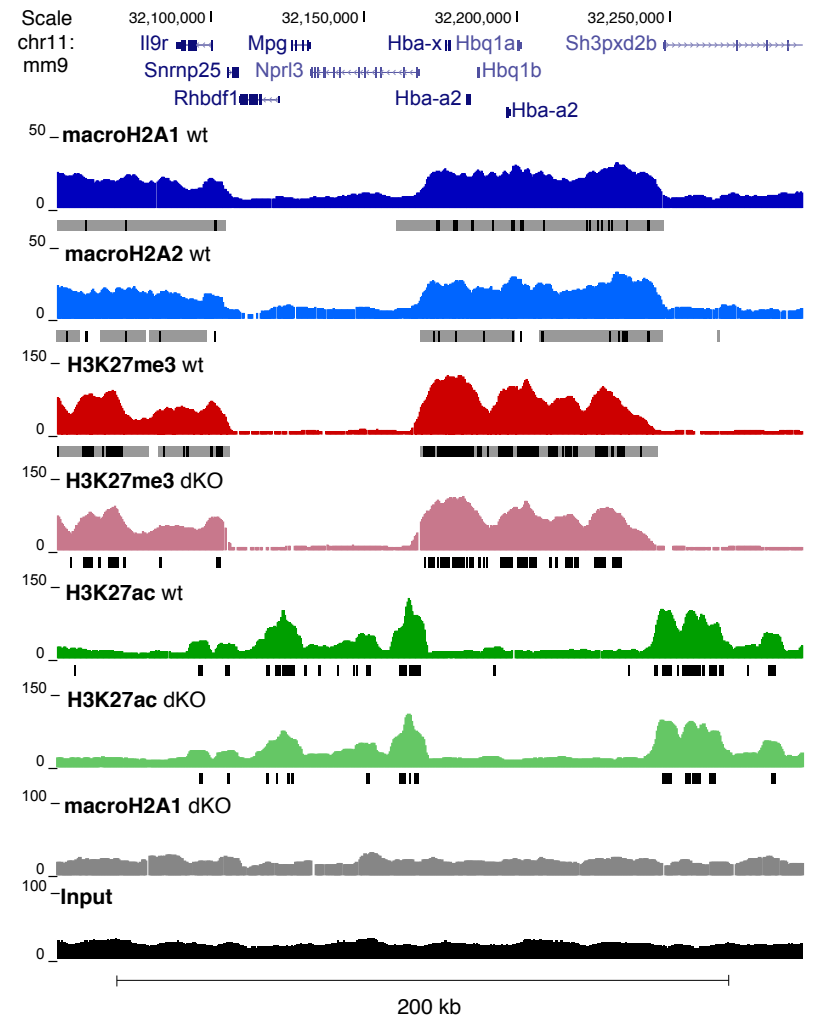

**Supplementary Figure S6. ChIP-seq in macroH2A wild type and dKO DF cells.** (a) Raw number of reads obtained by Illumina Hi-Seq, total number of alignments and alignments used for peak calling for macroH2A1, macroH2A2 H3K27me3 and H3K27ac. (b) UCSC genome browser snapshot for ChIP-seq profiles of macroH2A1, macroH2A2, H3K27me3 and H3K27ac at the alpha globin cluster (Hba genes). MACS peaks (black bars) and Sicer domains (grey bars) are annotated under each profile. ChIP-seq performed with macroH2A1 in macroH2A dKO cells (dKO) and Input were used to confirm specificity of ChIP-seq signals. (c) Bioanalyzer traces of Input, macroH2A1, macroH2A2, H3K27me3 and H3K27ac ChIP-seq library DNA from wild type and dKO dermal fibroblasts; arrow represents mononucleosomes. Note low levels of DNA in macroH2A1 and macroH2A2 ChIP in dKO cells (asterisk).

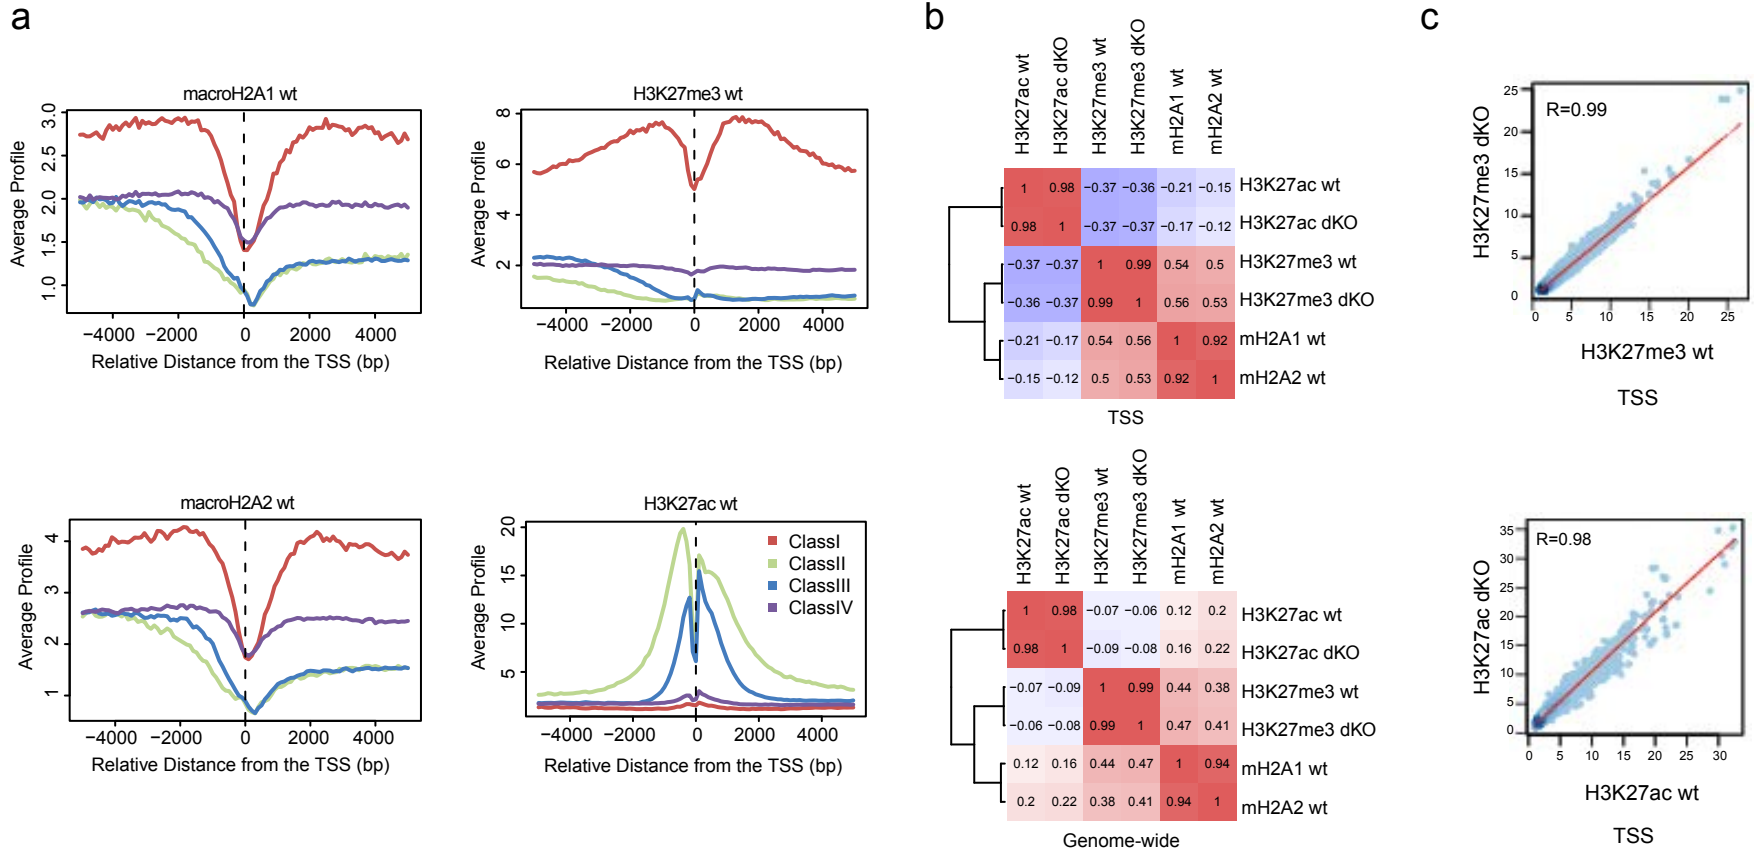

**Supplementary Figure S7. ChIP-seq analysis in macroH2A wt and dKO DFs.** (a) Average signal of ChIP-seq reads around the transcriptional start site (TSS) of the four classes of genes identified by K-means clustering, for each chromatin mark. (b) Correlation heatmap of H3K27 modifications and histone variants macroH2A1 and macroH2A2 performed with ChIP-seq reads from macroH2A wt and dKO DFs, 5Kb around the TSS and genome-wide, using autosomes. Hierarchical clustering shows that macroH2A variants correlate with H3K27me3. (c) Correlation plot of H3K27me3 and H3K27ac in TSS analysis of autosomal genes of ChIP-seq reads from macroH2A wt and dKO DFs. Pearson correlation value top left.

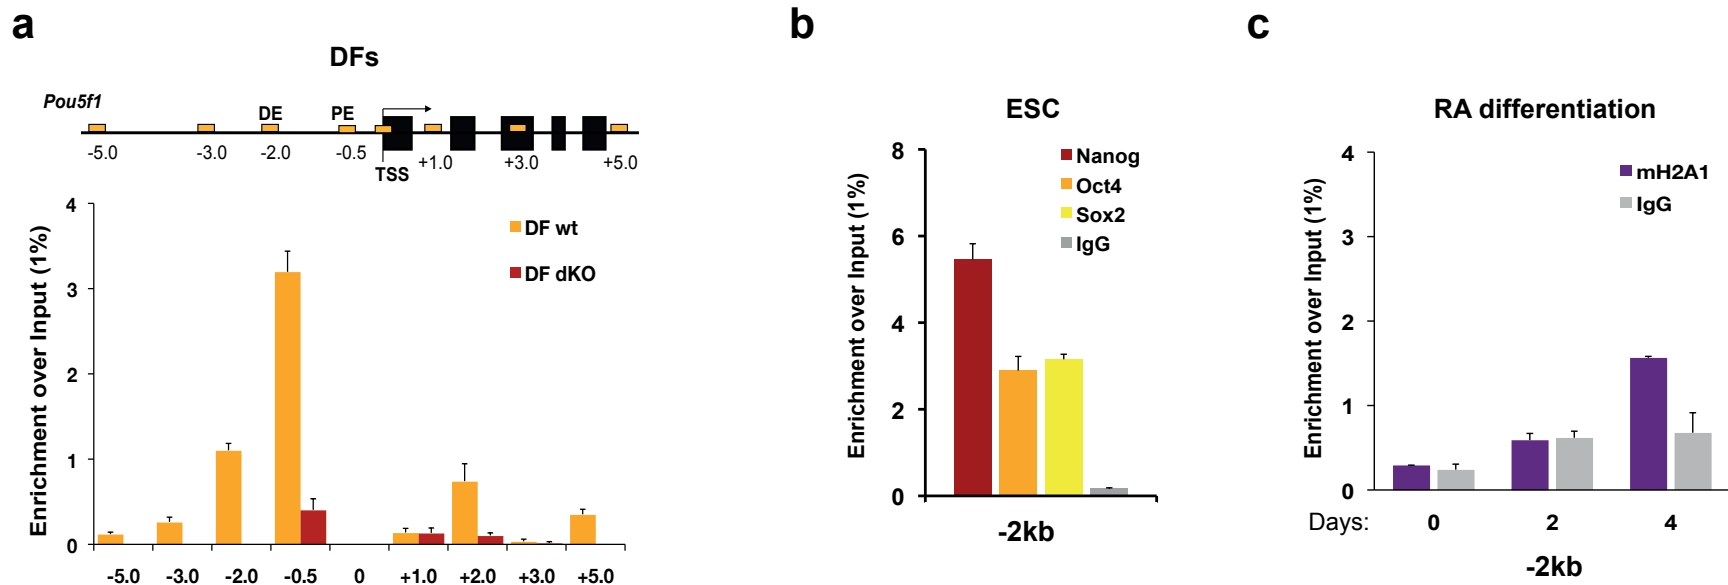

**Supplementary Figure S8. ChIP analysis of macroH2A1 at the *Oct4* locus.**(a) Native ChIP for macroH2A1 followed by qPCR demonstrates deposition of macroH2A1 upstream of the transcription start site (TSS) of the *Oct4* gene in mouse DFs (*Pou5f1*, chr17: 35642982-35647721); mean  $\pm$  s.d. (n=3). Map of the *Oct4* locus with primer positions shown above; DE (distal enhancer) and PE (proximal enhancer). (b) Cross-linked ChIP in ESCs for *Oct4*, *Nanog* and *Sox2* occupancy at the -2kb position of *Oct4*, mean  $\pm$  s.d. (n=3). (c) Cross-linked ChIP-qPCR analysis of macroH2A1 at the -2kb position shows enrichment upon ESC differentiation by RA.



**a**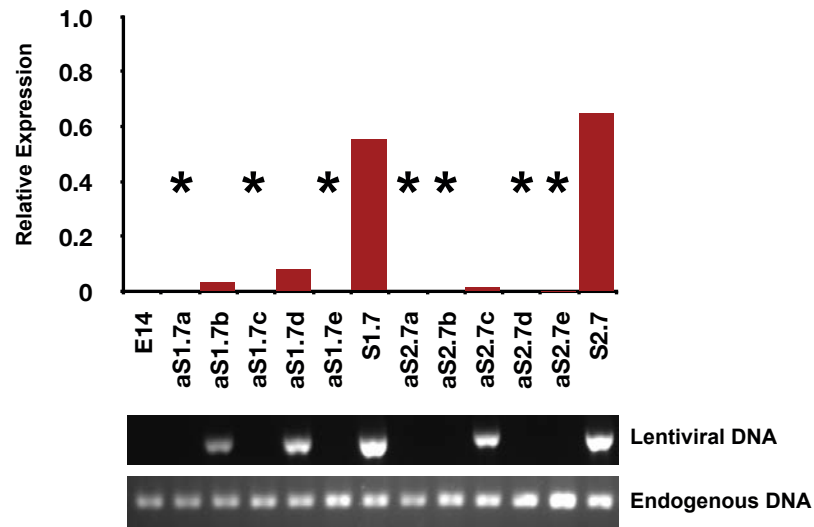**b**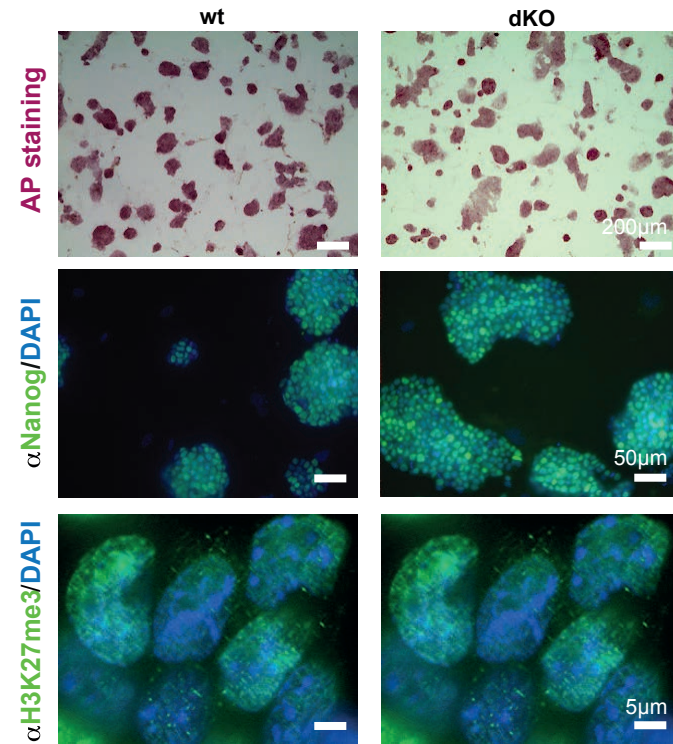

**Supplementary Figure S9. Characterization of macroH2A wild type and dKO iPS cells.** (a) Excision of Stemcca lentiviral vector integration was performed by qPCR of DNA isolated from iPS clones after adenoviral transduction of Cre-recombinase. Lentiviral-free clones (marked by an asterisk) were then expanded and further analyzed. Primers for endogenous DNA were used as a control for the qPCR. (b) Bright field and IF of iPS cells derived from wt and dKO DFs displaying AP and Nanog positive colonies; H3K27me3 IF showing no evidence of Xi and similar levels of H3K27me3; DAPI used to stain DNA; Scale bars: 200μm (AP staining), 50μm (Nanog), 5μm (H3K27me3).

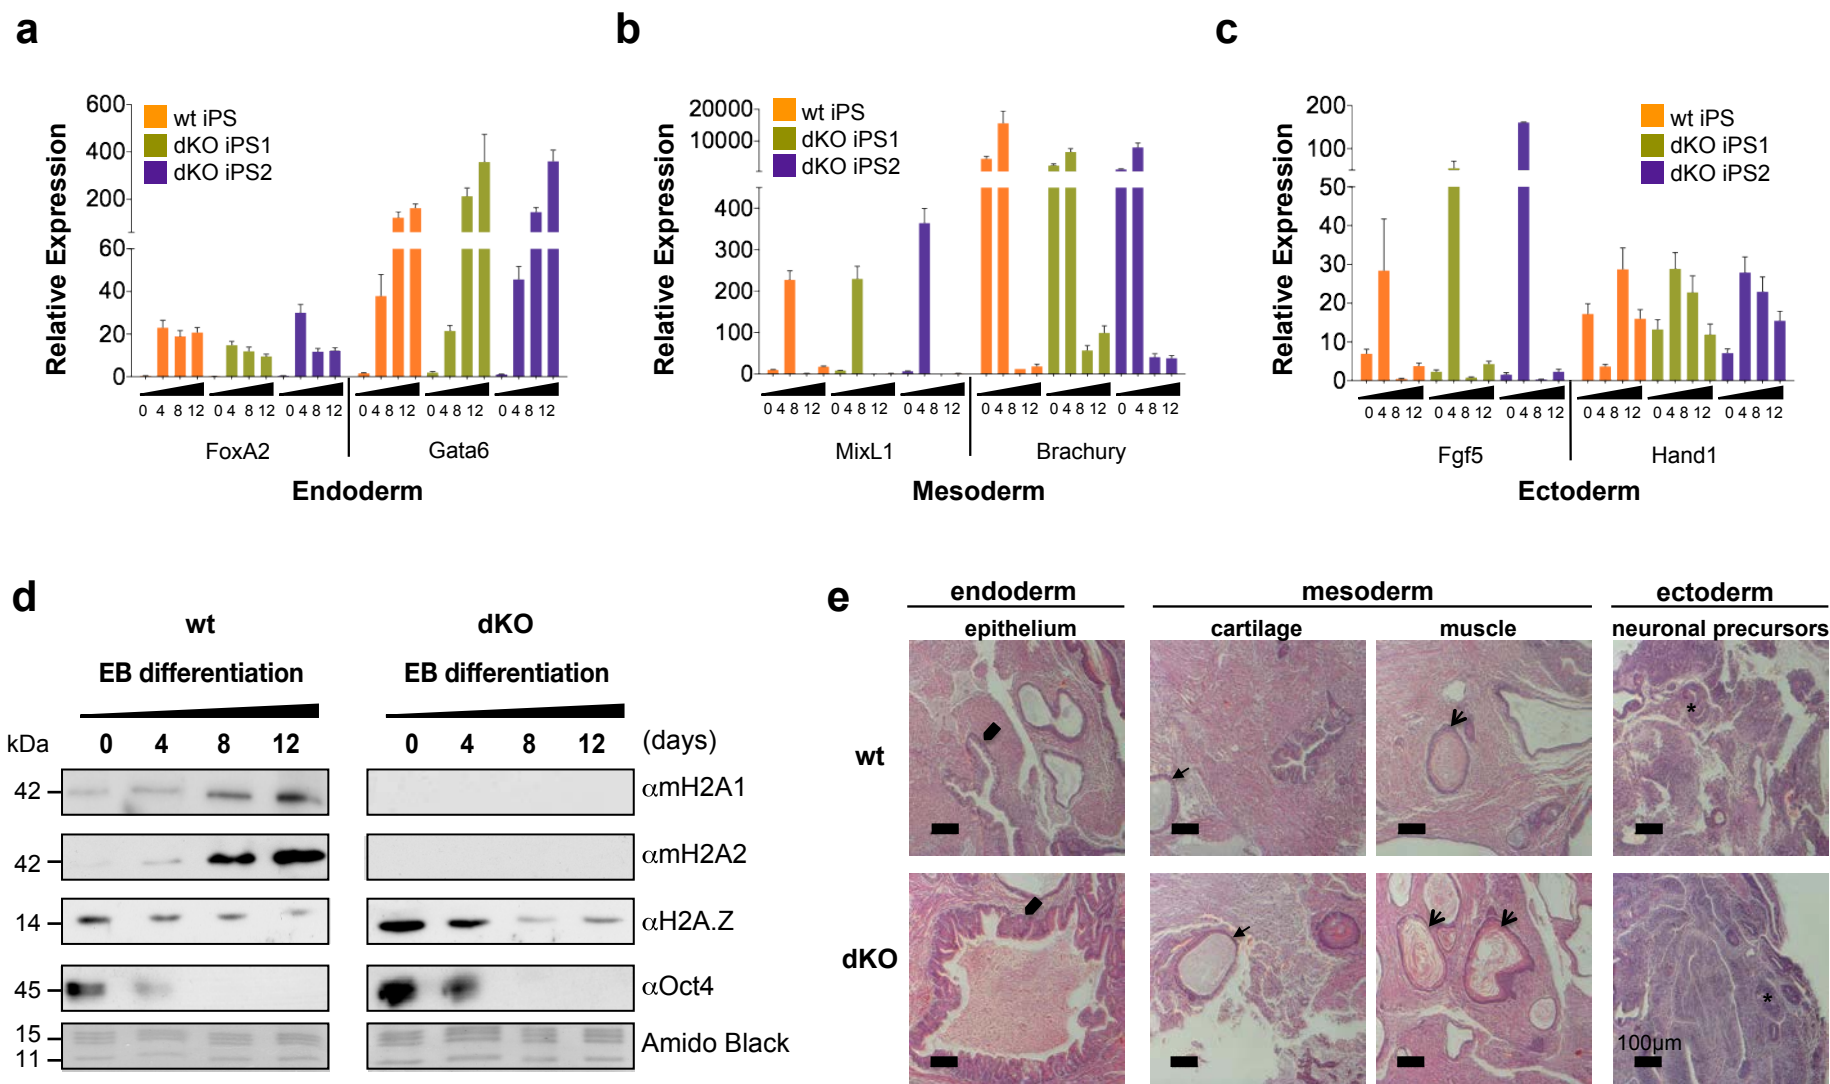

**Supplementary Figure S10. Characterization of the differentiation potential of macroH2A dKO iPS cells.** (a-c) qRT-PCR analysis of EB differentiation of wt and dKO iPS cells as described in Fig. 6D. Lineage markers from all three germ layers shown; relative expression is plotted using ribosomal L7 as a house-keeping gene, and normalized to ESC basal expression, mean  $\pm$  s.d. ( $n=3$ ). (d) Immunoblots of H2A variants using the chromatin fraction of cells from an EB differentiation time course (12 days). Increased macroH2A deposition is observed in wt but not dKO cells; Amido Black stain of histones is used for loading. Blots represent 2 independent EB differentiations. (e) Hematoxylin and eosin staining of representative wt and dKO teratomas derived from iPSCs, exhibiting ectoderm, mesoderm, and endodermal differentiation. Arrows and asterisks depict respective structures; scale bar, 100 $\mu$ m. One of two independent experiments shown (see also Fig. 6d).

## Supplementary Methods

**Cell culture and viral production.** Dermal fibroblasts (DFs) and mouse embryonic fibroblasts (MEFs) were grown in DMEM (CellGro) with 10% FBS and 1% Pen/Strep. ESCs and iPSCs were maintained on 0.1% gelatin-coated plates or on a feeder layer of irradiated MEFs, and grown in DMEM supplemented with 15% FBS (Benchmark), 1 mM L-glutamine, 0.1 mM nonessential amino acids, 1% Pen/Strep, 1 mM sodium pyruvate, 0.1 mM 2-mercaptoethanol and recombinant LIF. HEK293T cells used for viral production were grown in DMEM with 10% FBS, 1% Pen/Strep. Cells were plated at a density of  $2 \times 10^7$  cells per 150mm dish. The next day, cells were transfected with 60 $\mu$ g of DNA using Lipofectamine 2000 (Invitrogen). Supernatant was collected 48h, 60h and 72 h post-transfection, combined and filtered through 45 $\mu$ m filters. Viral supernatants were concentrated by ultracentrifugation (50,000g for 3h at 4°C) and resuspended in PBS (Stemcca or pMX) or using Amicon (Millipore) column centrifugation (3,000g for 30 min at 4°C) for GFP-tagged histones.

**Plasmids.** The iPS reprogramming 4F (Oct4, Sox2, Klf4 and Myc) are encoded individually in the pMX retroviral vector, or together in a 3 Factor (with reporter gene mCherry) polycistronic lentiviral vector (Stemcca, kindly provided by Gustavo Mostoslavsky, Boston University). GFP-tagged rat macroH2A1.1, rat macroH2A1.2, and human macroH2A2 constructs were cloned into lentiviral pLKO.1 backbone and human H2B-GFP is encoded in pLKO.1.

**Proliferation and EdU incorporation.** For the MTS proliferation assay, DFs were plated in 96-well plates (1,000 or 2,000 cells per well, one plate per time point) using six technical replicates and four biological samples per condition (wt and dKO). Time points were taken using the MTS tetrazolium compound (3-(4,5-dimethylthiazol-2-yl)-5-(3-carboxymethoxyphenyl)-2-(4-sulfophenyl)-2H-tetrazolium) according to the manufacturer's instructions (Promega). Absorbance values (490 nm) were recorded using a BIOTEK Microplate Reader. P value was

calculated between wt and dKO using an unpaired Student's t-test (two tailed). For EdU incorporation (Invitrogen), dermal fibroblasts were plated in 8 chamber slides (20,000 cells per chamber) using two technical replicates and four biological samples per condition (wt and dKO). 5-ethynyl-2'-deoxyuridine (EdU) was added to the media and washed out after 12h. Detection of EdU incorporation was performed as described in the manufacture's instructions, and EdU/DAPI signals were detected using a fluorescent microscope, Number of cells were counted using Image J software.

**Lentivirus excision.** Excision of the lentiviral vector was performed using an adenovirus expressing Cre-recombinase. iPS clones were trypsinized and 10,000 cells incubated for three hours with  $1 \times 10^8$  PFU of adeno-Cre-GFP (Vector Labs) at 37°C and 0.5ml of ESC media. Cells were then plated onto 100mm dish plates and colonies were picked after 10-15 days. Lentiviral - free clones were then expanded and tested for the presence of the lentiviral vector using primers for the DNA of the Stemcca construct (cMYC F 5' -GGA ACT CTT GTG CGT AAG TCG ATA G-3'; WPRE R 5' -GGA GGC GGC CCA AAG GGA GAT CCG-3') and endogenous DNA was used as qPCR control, using the promoter region of the Cbx7 gene, 5Kb upstream of the TSS (F 5'-CTC CAG CCC CAT AAT TTG AA- 3'; 5' - AAC CAA GCC CTC ACT GCT TA- 3').

## ChIP and qRT-PCR Primers

### Native ChIP primers

*Pou5f1* gene locus (Chromosome 17: 35,642,982-35,647,721)

|           |                      |                       |
|-----------|----------------------|-----------------------|
| -5.0Kb    | CACTGGTGGTGTGAGCAAGT | TGGCTGGCTTAGAGTGTGAA  |
| -3.0Kb    | ACCTTTTCATGCTGGTGGAC | CTTGCCACAAACCACCTGTA  |
| -2.0Kb    | GACGGCAGATGCATAACAAA | AGGAAGGGCTAGGACGAGAG  |
| -0.5Kb    | CTGGGGACATATCTGGTTGG | CCCAGTATTTTCAGCCCATGT |
| 0Kb (TSS) | TAGGTGAGCCGTCTTTCCAC | CGAAGTCTGAAGCCAGGTGT  |
| +1Kb      | TGTGGAGTAGGGCTCACCTT | AGATCTGCACCTCAGGCACT  |
| +3Kb      | GTCCCAGCTGGTGTGACTCT | CCAAGGTGATCCTCTTCTGC  |
| +5Kb      | AGGAAGGCATTGCATATTCG | TGCCAGACAATGGCTATGAG  |

### Formaldehyde cross-linked ChIP

*Pou5f1* gene (region A)

GGAAGTGGGTGTGGGGAGGTTGTA                      AGCAGATTAAGGAAGGGCTAGGACGAGAG

### qRT-PCR - ESC and lineage markers

| <b>Gene</b>  | <b>Forward primer</b>    | <b>Reverse primer</b>     |
|--------------|--------------------------|---------------------------|
| L7 (control) | AGCGGATTGCCTTGACAGAT     | AACTTGAAGGGCCACAGGAA      |
| Brachyury    | CCGGTGTGAAGGTAAATGT      | CCTCCATTGAGCTTGTGGT       |
| Fgf5         | CTGTATGGACCCACAGGGAGTAAC | GTAGAGGAGGATAACACGCACTG   |
| Flk1         | TTTGCAAATACAACCCTTCAGA   | GCAGAAGATACTGTCACCACC     |
| FoxA2        | TAGCGGAGGCAAGAAGACC      | CTTAGGCCACCTCGCTTGT       |
| Gata4        | CCCTACCCAGCCTACATGG      | ACATATCGAGATTGGGGTGTCT    |
| Gata6        | ACAGCCCACTTCTGTGTTCCC    | CTTCTGTTTCCGATCAGCTCCCTTG |
| Hand1        | GCGTCAGTACCCTGATGCCTTC   | GCCCATGTGATCTGACACCCTGAG  |
| MixL1        | TTGAATTGAACCCTGTTGTCCC   | ACTCTAGGTATCCGTCAGGGAAG   |
| Nanog        | AGGGTCTGCTACTGAGATGCTCTG | CAACCACTGGTTTTTCTGCCACCG  |
| Nestin       | CCCTGAAGTCGAGGAGCTG      | CTGCTGCACCTCTAAGCGA       |
| Oct4         | CTGTAGGGAGGGCTTCGGGCACTT | CTGAGGGCCAGGCAGGAGCACGAG  |
| Pax3         | ATAAGCCCAGGACACAGAGTTGTG | CTCGGTCAAGGATGGAAGC       |
| Rex1         | CAGTCCAGAATACCAGAGTGGA   | GGTCTTCATGGATTCCCTCAGCTTC |

### qRT-PCR - Time course Reprogramming

| <b>Gene</b> | <b>Forward primer</b>    | <b>Reverse primer</b>     |
|-------------|--------------------------|---------------------------|
| Fgf4        | CAAGCTCTTCGGTGTGCCTTTC   | CGTAGGCGTTGTAGTTGTTGGG    |
| Sall1       | AGCCCTTTGCTTGCACTATCTGTG | ATATGGGTGCCATGTGGACCTTC   |
| Sall4       | TCACCACGAAAGGCAACCTGAAGG | CATTCAGGACGCTGGTGTACTGGTT |

| <b><u>Antibody</u></b>      | <b><u>Company</u></b>      | <b><u>Cat #</u></b> | <b><u>Application</u></b> |
|-----------------------------|----------------------------|---------------------|---------------------------|
| Alpha-SMA                   | Abcam                      | ab5694              | IHC                       |
| FoxA2                       | Cell Signaling             | 8186S               | IHC                       |
| GFP                         | Roche                      | 11814460001         | WB                        |
| H2A.Z                       | Millipore                  | 07-594              | WB                        |
| H3K18ac                     | Millipore                  | 07-354              | WB                        |
| H3K27ac                     | Abcam                      | ab4729              | WB, nChIP                 |
| H3K27me3                    | Millipore                  | 07-449              | WB, nChIP, IF             |
| H3K36me2                    | Millipore                  | 07-369              | WB                        |
| H3K79me2                    | Abcam                      | ab3594              | WB                        |
| H3K9ac                      | Millipore                  | 07-352              | WB                        |
| IgG                         | Millipore                  | 12-370              | ChIP                      |
| macroH2A1                   | Abcam                      | ab37264             | nChIP, IF                 |
| macroH2A1                   | Millipore                  | 07-219              | WB                        |
| macroH2A2                   | Pehrson and Bernstein labs |                     | WB, nChIP                 |
| Nanog                       | CosmoBio                   | RCAB0002P-F         | IF                        |
| Nestin                      | Stem Cell Technologies     | 01418               | IHC                       |
| Oct4                        | Santa Cruz                 | sc8628              | WB, IF                    |
| panH3ac                     | Millipore                  | 06-599              | WB                        |
| panH4ac                     | Millipore                  | 06-866              | WB                        |
| Sox2                        | Santa Cruz                 | sc17320             | ChIP                      |
| Vimentin                    | Santa Cruz                 | sc7557              | IF                        |
| Alexa-488 (anti-goat IgG)   | Molecular Probes           | A11055              | IF (Secondary)            |
| Alexa-488 (anti-rabbit IgG) | Molecular Probes           | A21206              | IF (Secondary)            |
| Alexa-488 (anti-mouse IgG)  | Molecular Probes           | A21202              | IF (Secondary)            |
| Alexa-594 (anti-goat IgG)   | Molecular Probes           | A11058              | IF (Secondary)            |
| Alexa-594 (anti-rabbit IgG) | Molecular Probes           | A21207              | IF (Secondary)            |
| Alexa-594 (anti-mouse IgG)  | Molecular Probes           | A21203              | IF (Secondary)            |
| IgG-HRP (anti-rabbit)       | Millipore                  | 12348               | WB (secondary)            |
| IgG-HRP (anti-mouse)        | Invitrogen                 | 616520              | WB (secondary)            |
